# Supplementary material for: Midecamycin Is Inactivated by Several Different Sugar Moieties at Its Inactivation Site
Source: MDPI journal article supplement (doi:10.3390/ijms222312636), 2021-11-23
Supplement: s1 [file s1]

## **SUPPORTING INFORMATION**

### **Midecamycin is inactivated by several different sugar moieties at its inactivation site**

Ru Lin<sup>1</sup>, Li-Li Hong<sup>2</sup>, Zhong-Ke Jiang<sup>1</sup>, Ke-Meng Li<sup>1</sup>, Wei-Qing He<sup>1,\*</sup>, Jian-Qiang

Kong<sup>2,\*</sup>

1, NHC Key Laboratory of Biotechnology of Antibiotics, Institute of Medicinal  
Biotechnology, Chinese Academy of Medical Sciences & Peking Union Medical  
College, Beijing, 100050, China.

2, Institute of Materia Medica, Chinese Academy of Medical Sciences & Peking  
Union Medical College (State Key Laboratory of Bioactive Substance and Function of  
Natural Medicines & NHC Key Laboratory of Biosynthesis of Natural Products),  
Beijing, 100050, China

\*, Author to whom correspondence should be addressed.

E-mail: heweiqing@imb.pumc.edu.cn; jianqiangk@imm.ac.cn

## Figure legends

Figure S1 SDS-PAGE analysis of the purified SpnP (A), DesVII (B) and Srm29 (C).

M, Protein ladder indicated in kDa on the left margin; 1, Soluble fraction containing the target protein; 2, the purified protein. Red arrows indicated the target proteins.

Figure S2 <sup>1</sup>H-NMR spectrum (600 MHz) of midecamycin 2'-*O*-glucopyranoside (**1a**)

Figure S3 <sup>13</sup>C-NMR spectrum (150 MHz) of midecamycin 2'-*O*-glucopyranoside (**1a**)

Figure S4 COSY spectrum (600 MHz) of midecamycin 2'-*O*-glucopyranoside (**1a**)

Figure S5 HMBC spectrum (600 MHz) of midecamycin 2'-*O*-glucopyranoside (**1a**)

Figure S6 HSQC spectrum (600 MHz) of midecamycin 2'-*O*-glucopyranoside (**1a**)

Figure S7 The effects of pH (A) and temperature (B) on OleD activity

Figure S8 Glycosyl donors used in this study

Figure S9 <sup>1</sup>H-NMR spectrum (600 MHz) of midecamycin 2'-*O*-xylopyranoside (**1c**)

Figure S10 <sup>13</sup>C-NMR spectrum (150 MHz) of midecamycin 2'-*O*-xylopyranoside (**1c**)

Figure S11 COSY spectrum (600 MHz) of midecamycin 2'-*O*-xylopyranoside (**1c**)

Figure S12 HMBC spectrum (600 MHz) of midecamycin 2'-*O*-xylopyranoside (**1c**)

Figure S13 HSQC spectrum (600 MHz) of midecamycin 2'-*O*-xylopyranoside (**1c**)

Figure S14 The mass spectrum of midecamycin monoglycoside 1e (A), 1f (B) and 1g

(C) giving a molecular ion peak at  $m/z$  976.5085, 960.5138 and 1017.5350, respectively.

Figure S15 The modelled complex structure of OleD with UDP-GlcNAc. Gln331 and its surrounding residues were positioned in the purple inset.

Figure S16 The effect of alanine-scanning mutagenesis of four residues on the

conversions towards UDP-Glc (A), UDP-Xyl (B), UDP-GlcNAc (C), UDP-Rha (D) and UDP-Gal (E).

Figure S17 SDS-PAGE analyses of OleD and its 19 Q327 variants. Lane M, Protein marker, indicated as kDa in the margin of SDS-PAGE gel; Lane 1-20: OleD, Q327A, Q327C, Q327D, Q327E, Q327F, Q327G, Q327H, Q327I, Q327K, Q327L, Q327M, Q327N, Q327P, Q327R, Q327S, Q327T, Q327V, Q327W, Q327Y.

Figure S18 The effect of 19 Q327 variants on the conversions towards UDP-Glc (A), UDP-Xyl (B) and UDP-GlcNAc(C).

Figure S19 The plasmid map of pET-His

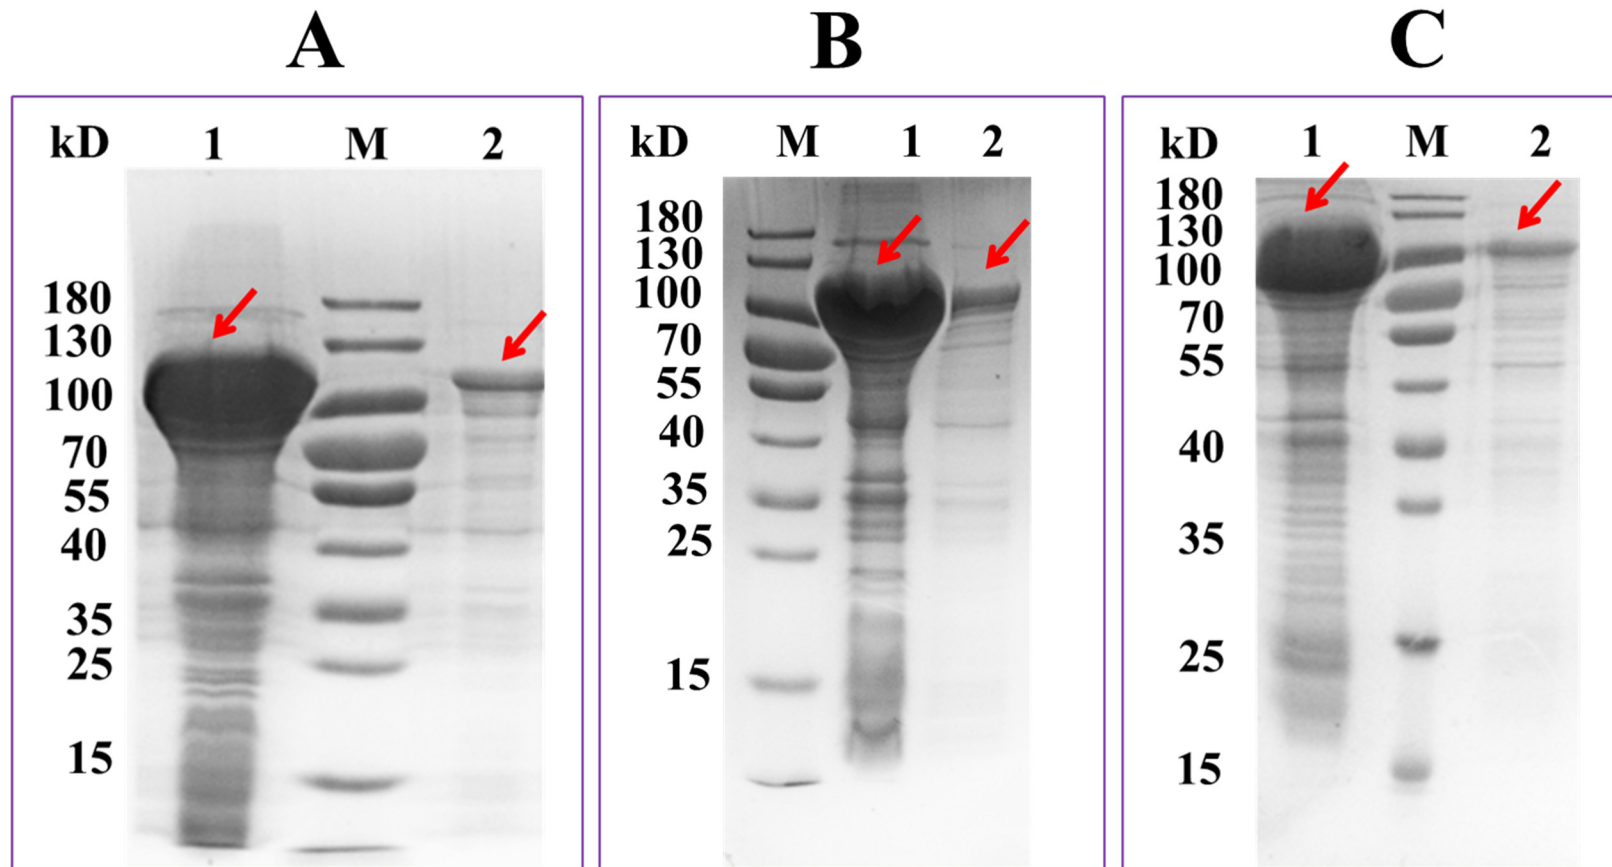

Figure S1 SDS-PAGE analysis of the purified SpnP (A), DesVII (B) and Srm29 (C)

M, Protein ladder indicated in kDa on the left margin; 1, Soluble fraction containing the target protein; 2, the purified protein. Red arrows indicated the target proteins.

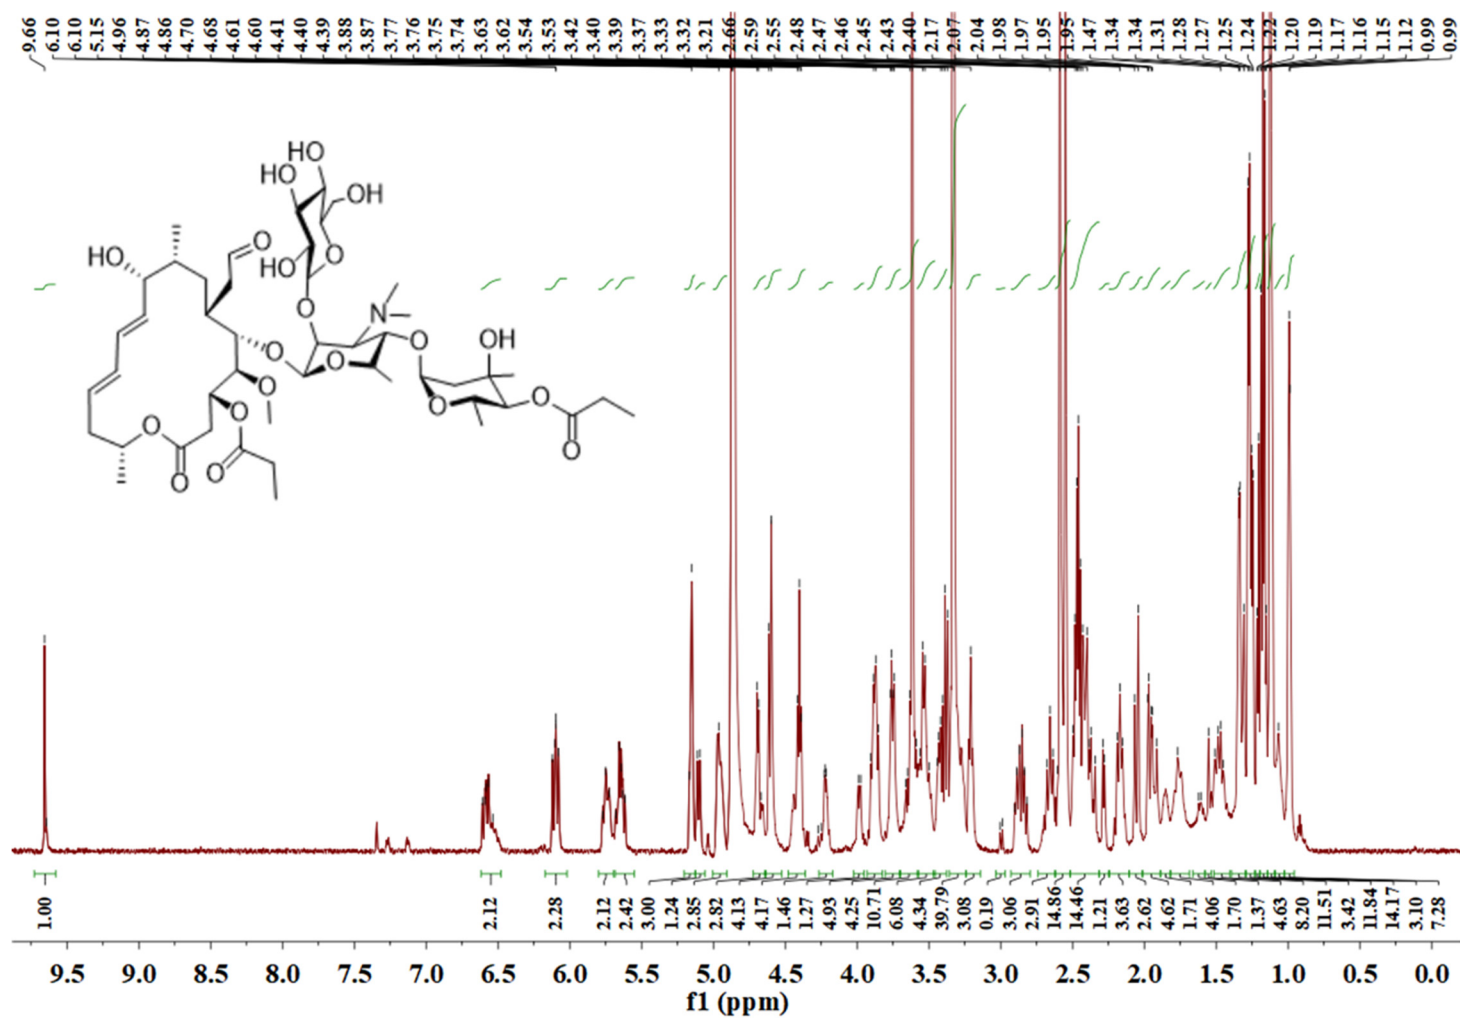

Figure S2  $^1\text{H}$ -NMR spectrum (600 MHz) of midecamycin 2'-O-glucopyranoside (1a)

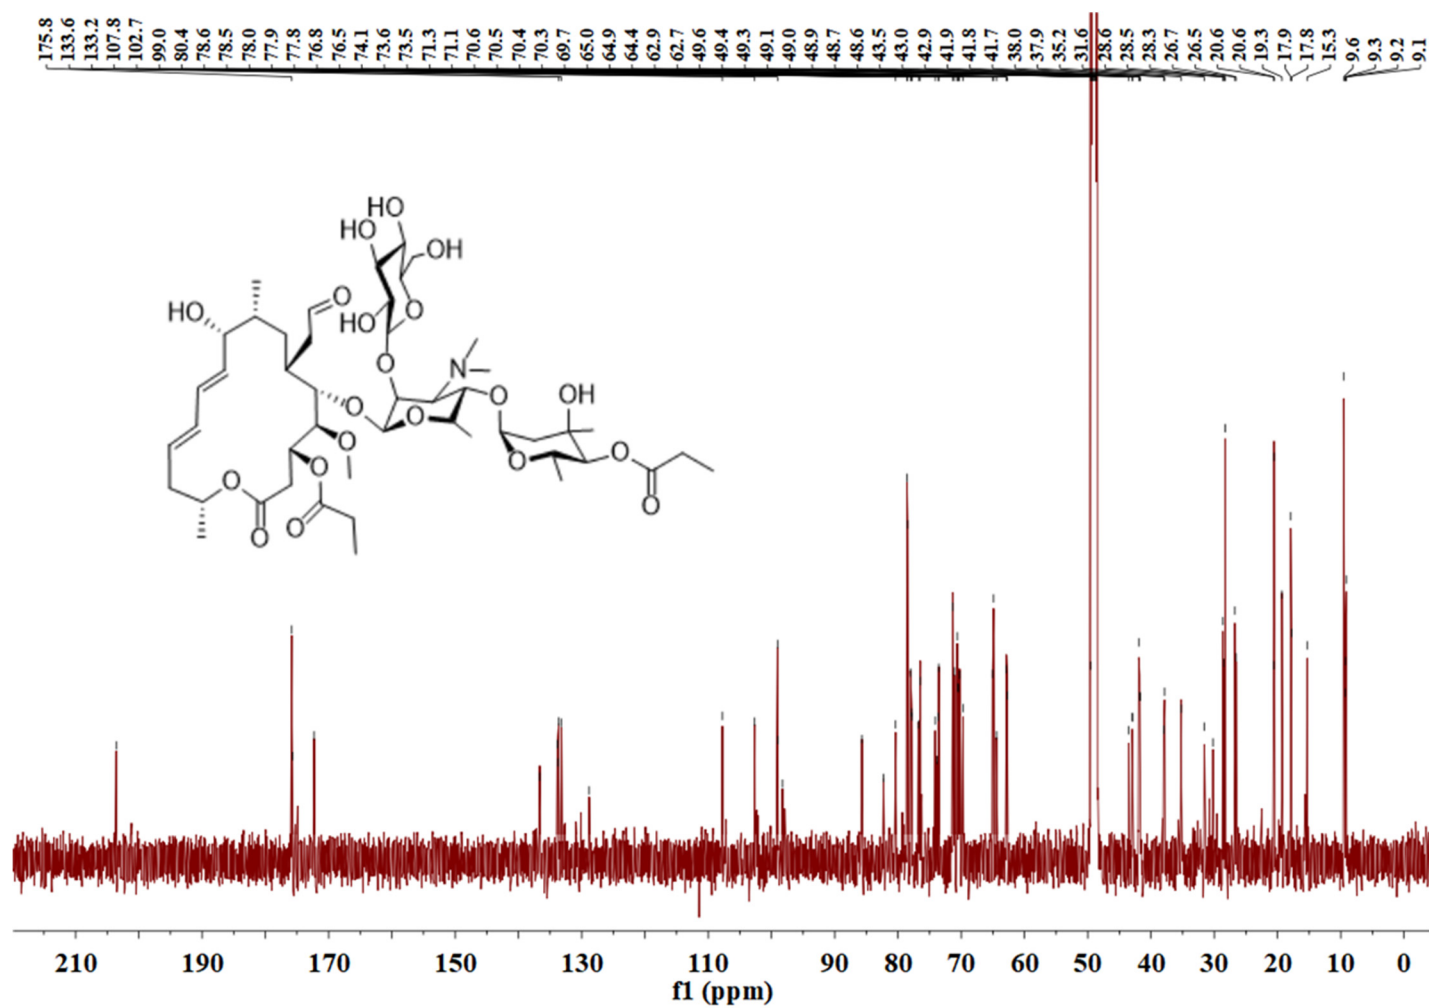

Figure S3  $^{13}\text{C}$ -NMR spectrum (150 MHz) of midcamycin 2'-O-glucopyranoside (1a)

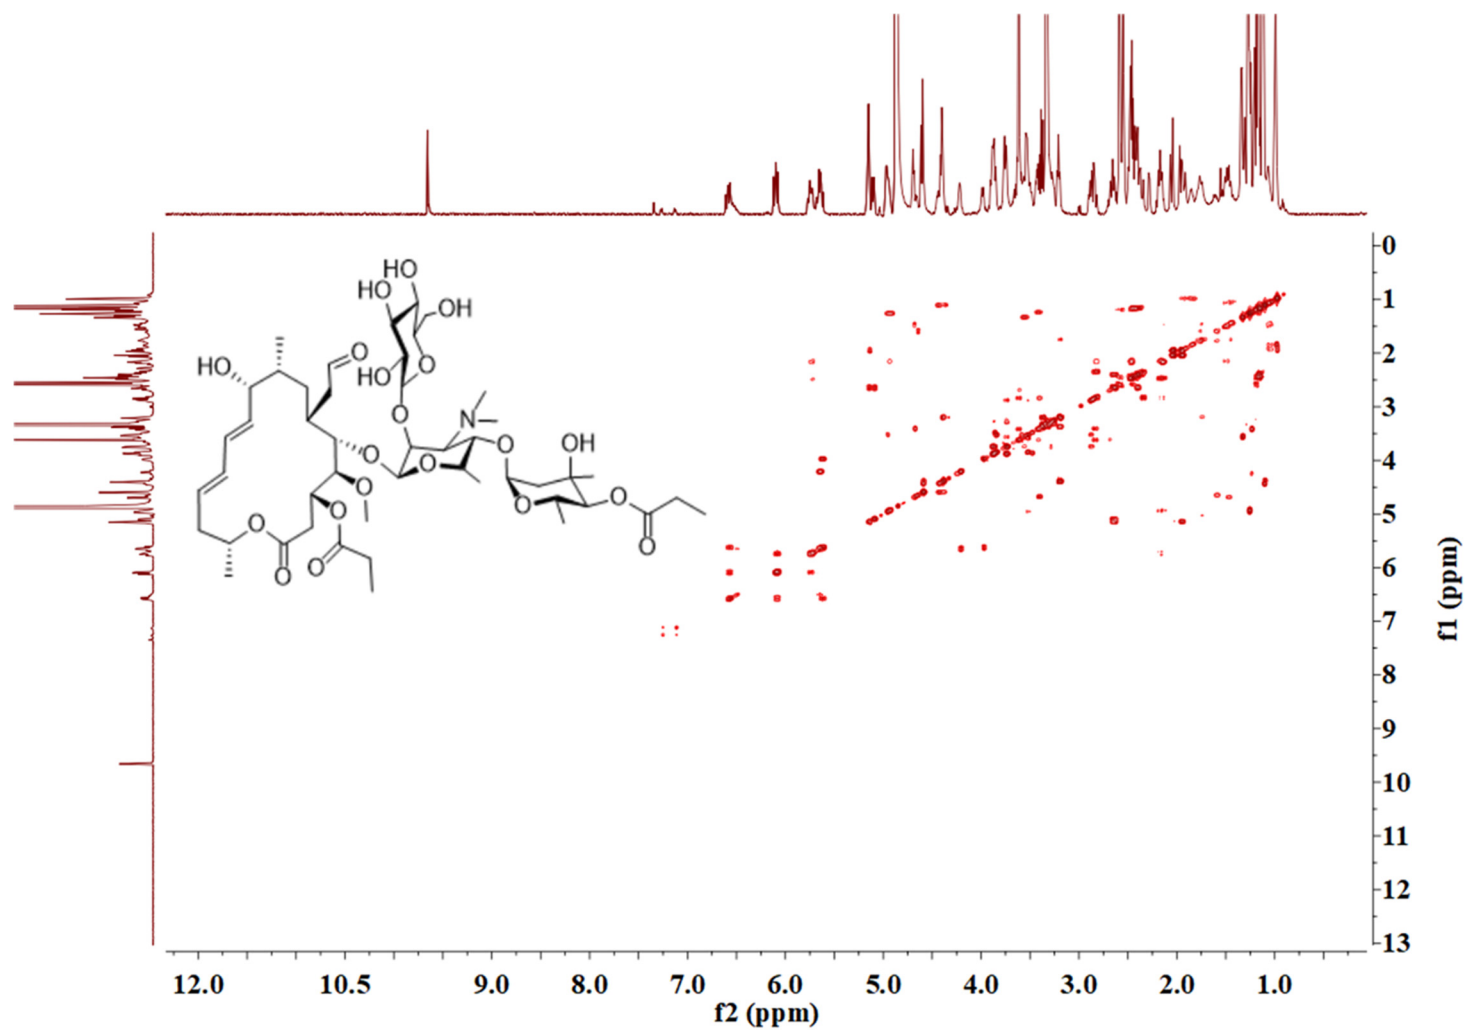

Figure S4 COSY spectrum (600 MHz) of midcamycin 2'-O-glucopyranoside (1a)

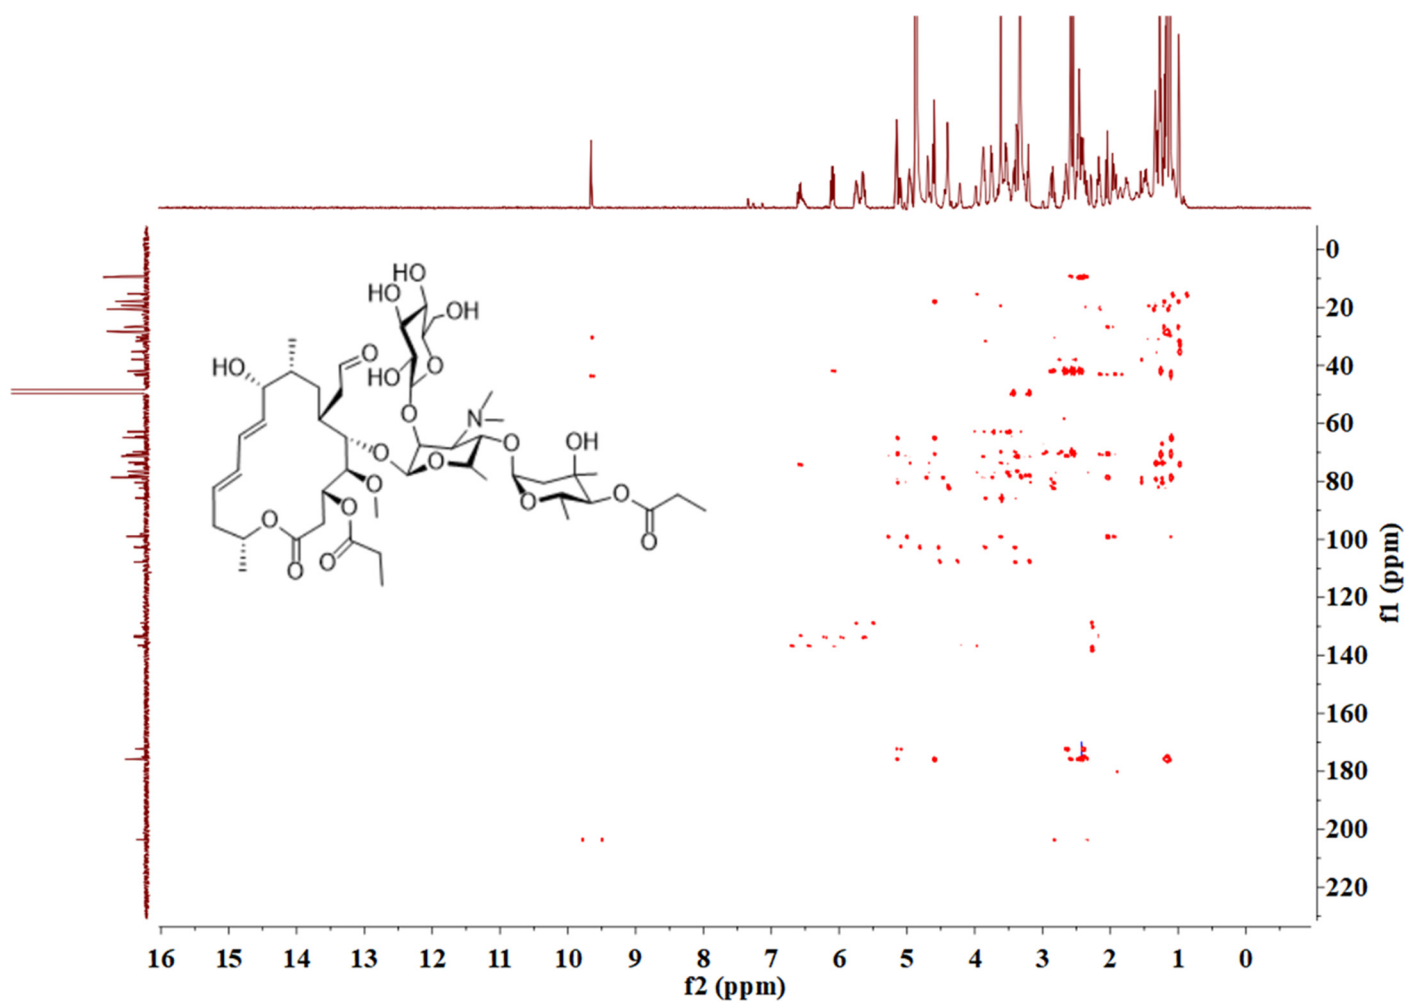

Figure S5 HMBC spectrum (600 MHz) of midecamycin 2'-O-glucopyranoside (**1a**)



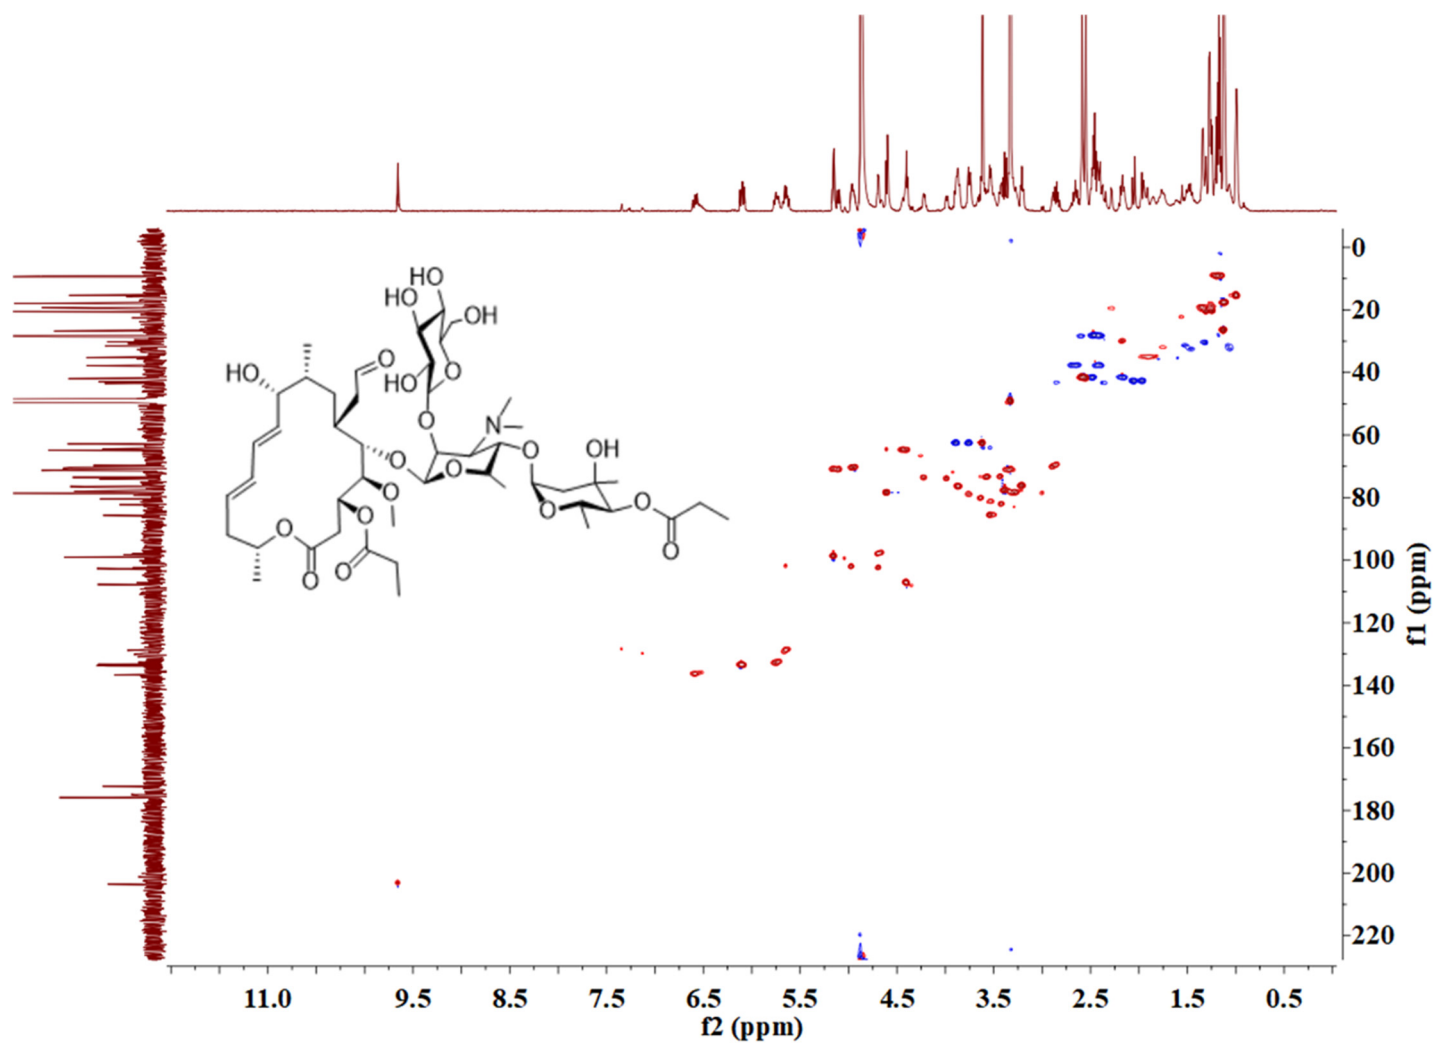

Figure S6 HSQC spectrum (600 MHz) of midecamycin 2'-O-glucopyranoside (**1a**)

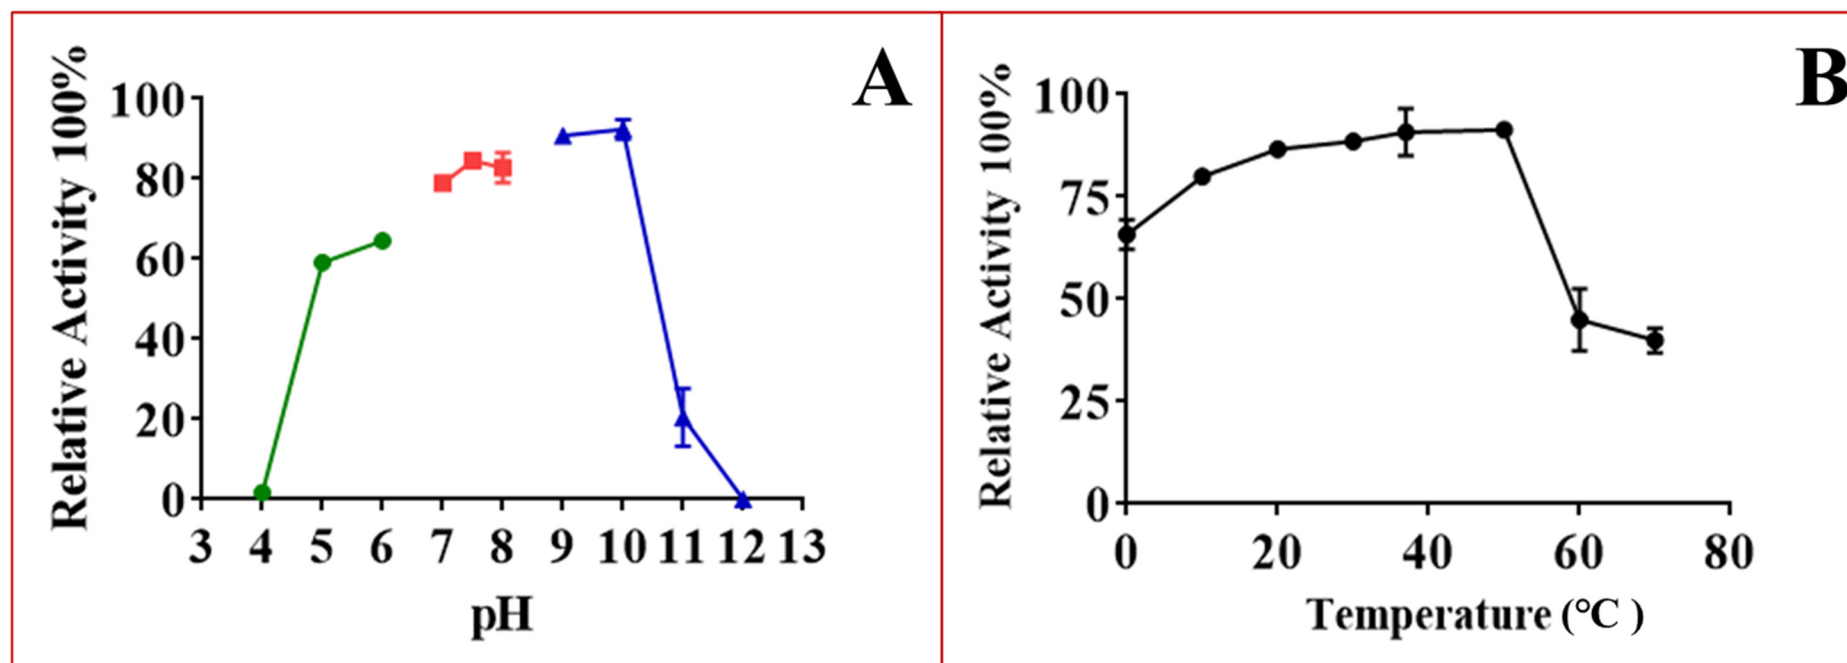

Figure S7 The effects of pH (A) and temperature (B) on OleD activity

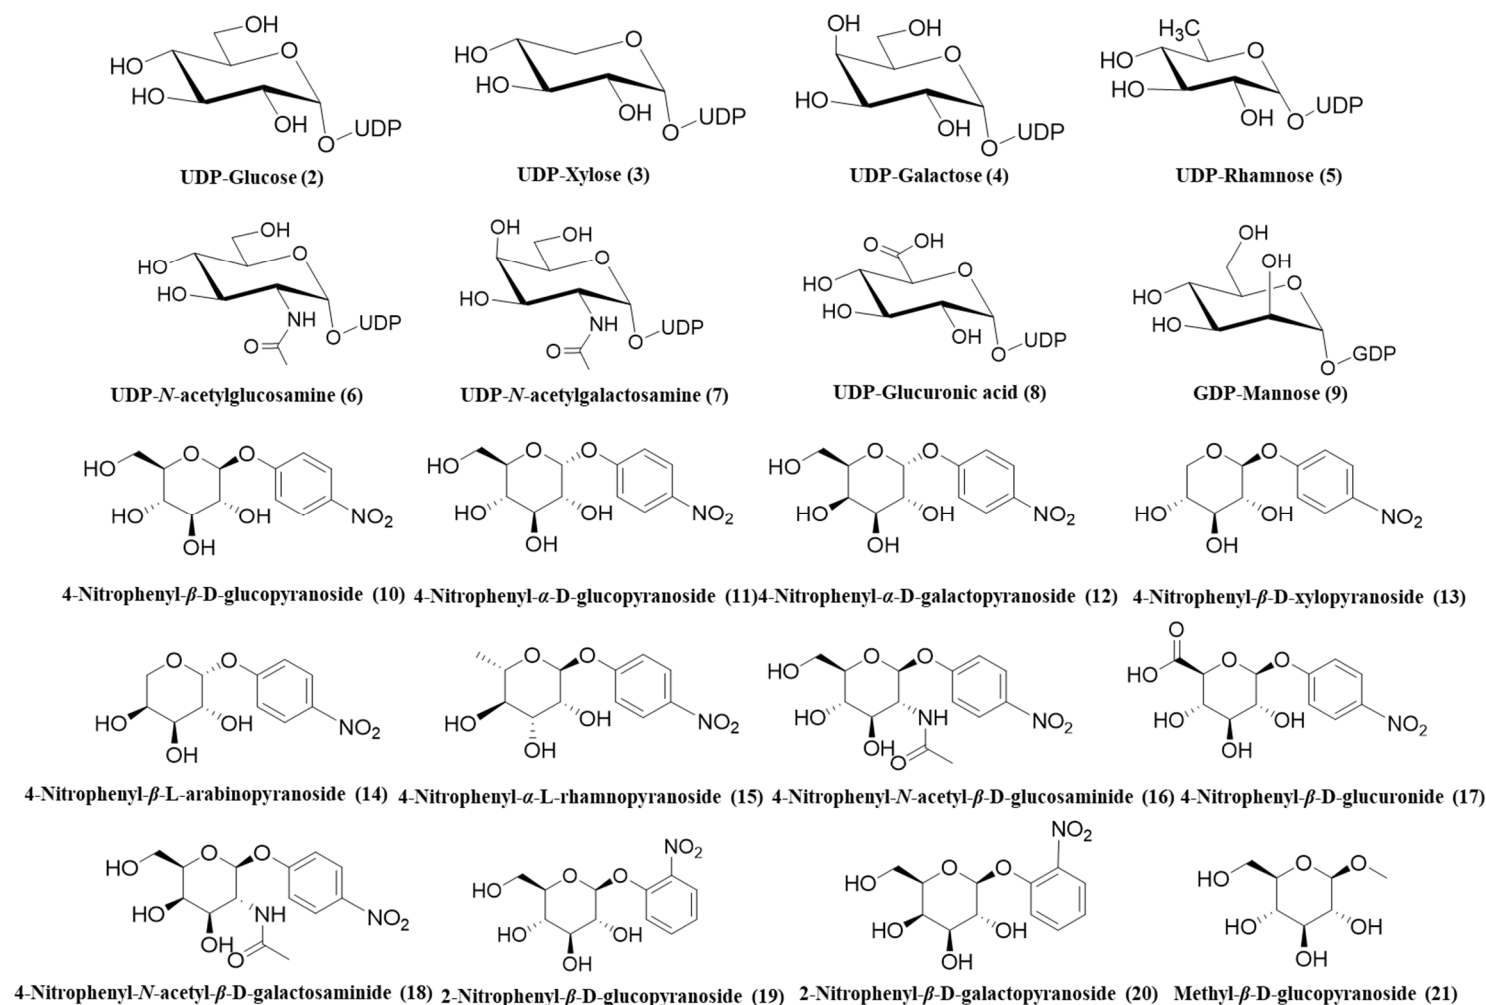

Figure S8 Glycosyl donors used in this study

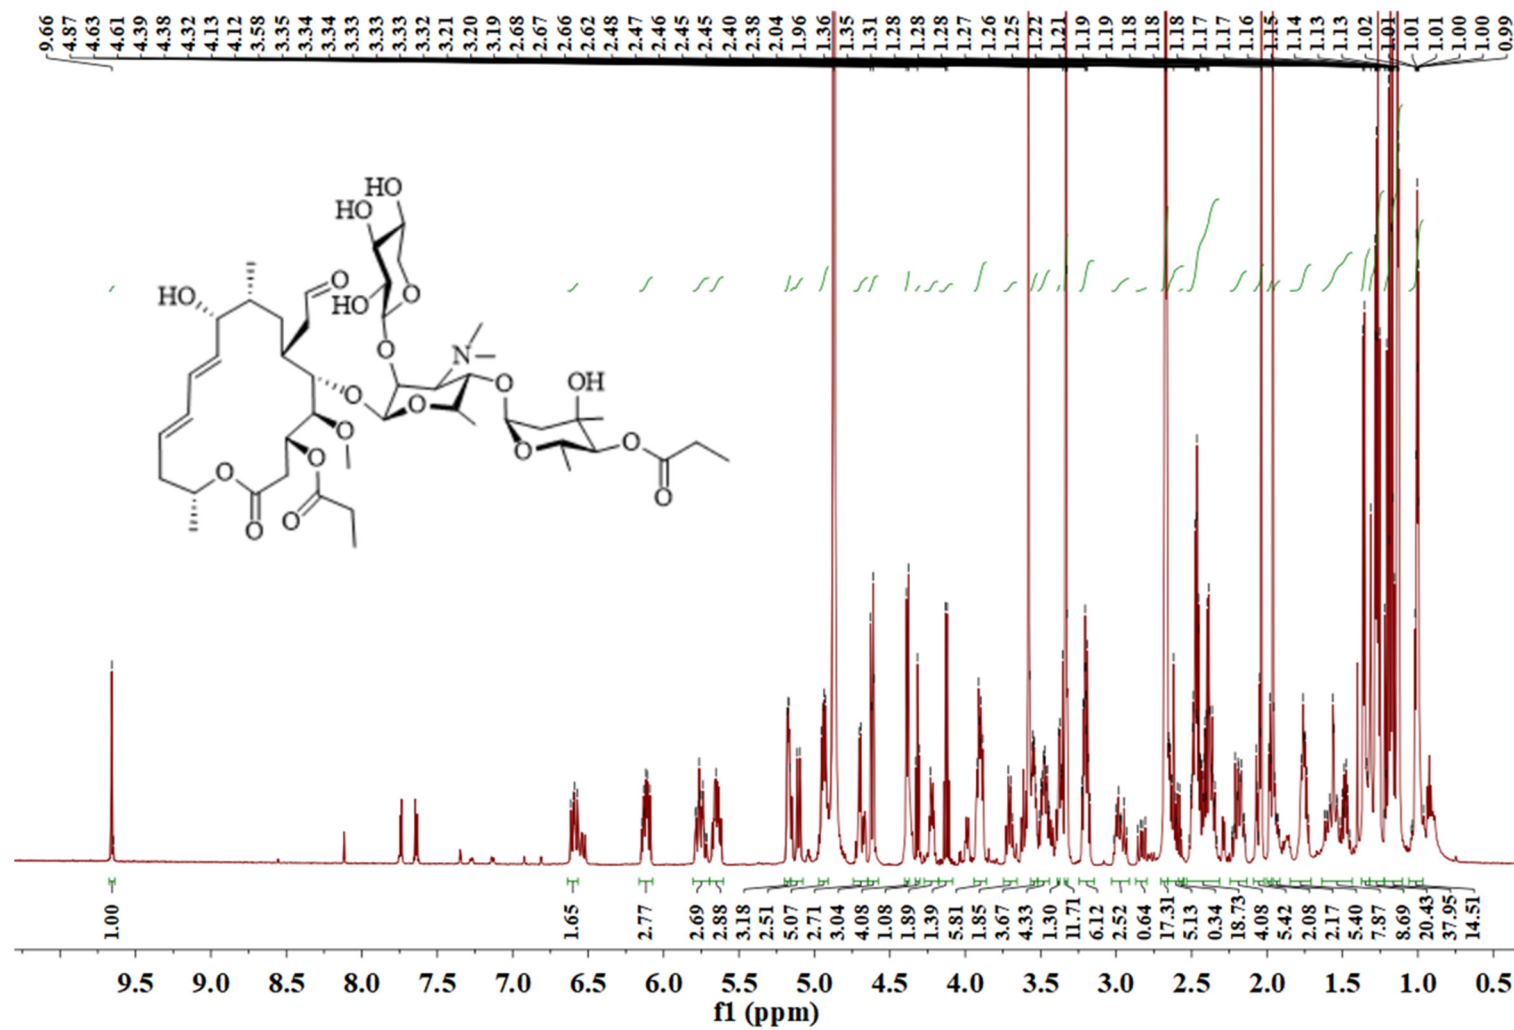

Figure S9 <sup>1</sup>H-NMR spectrum (600 MHz) of midecamycin 2'-O-xylopyranoside (1c)



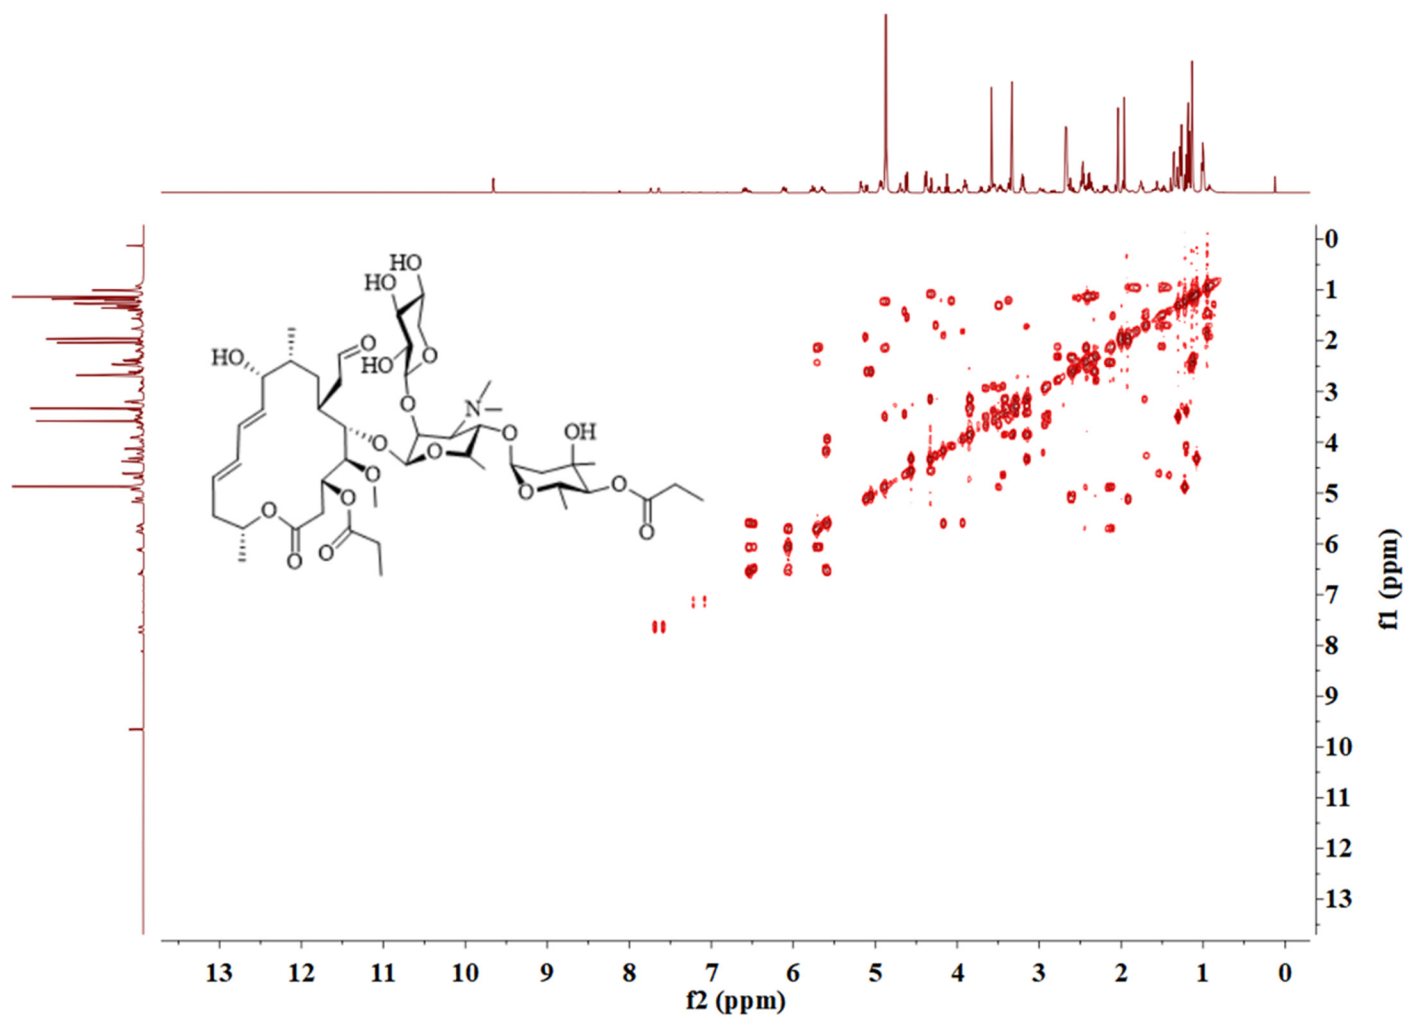

Figure S11 COSY spectrum (600 MHz) of midcamycin 2'-O-xylopyranoside (1c)

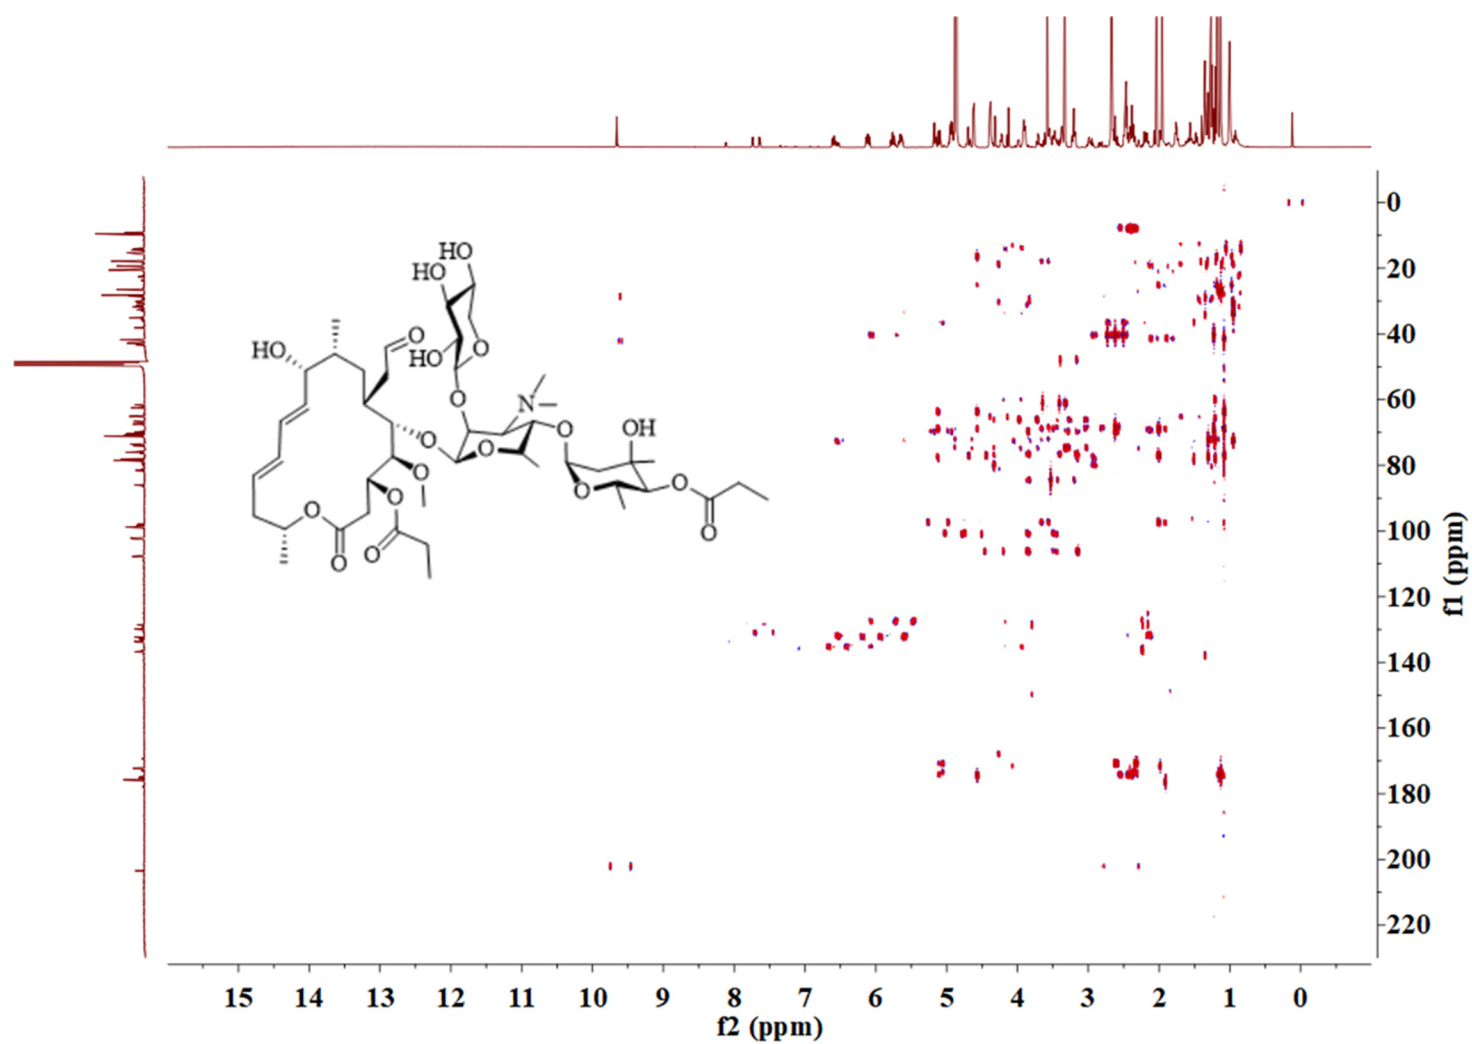

Figure S12 HMBC spectrum (600 MHz) of midecamycin 2'-O-xylopyranoside (**1c**)

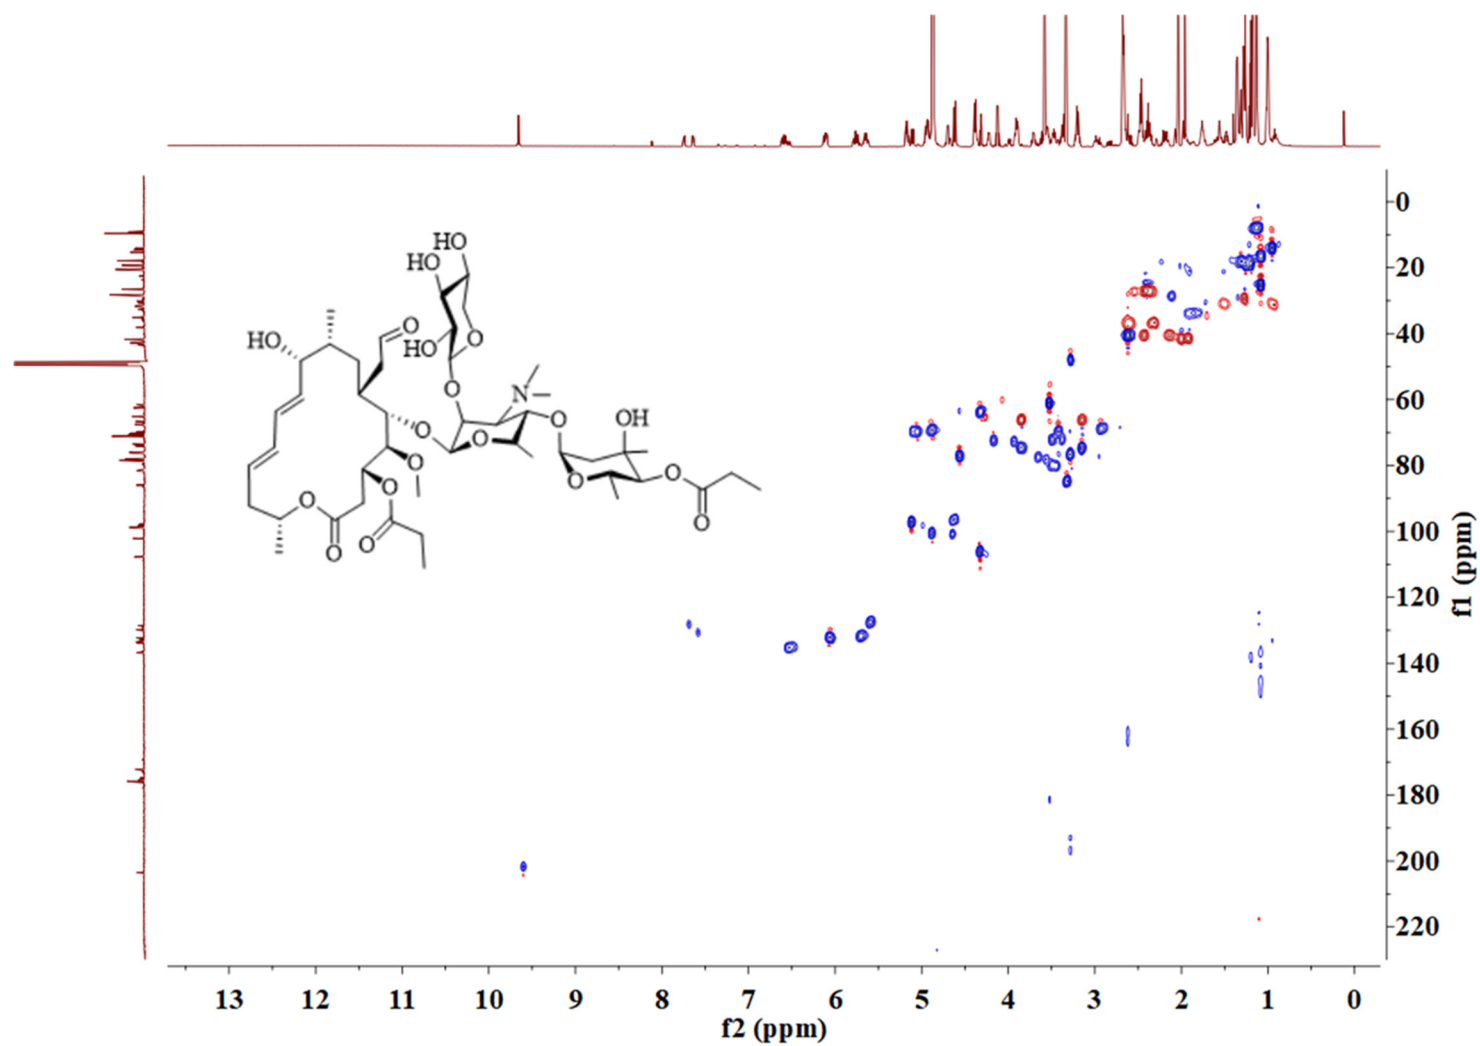

Figure S13 HSQC spectrum (600 MHz) of midcamycin 2'-O-xylopyranoside (1c)



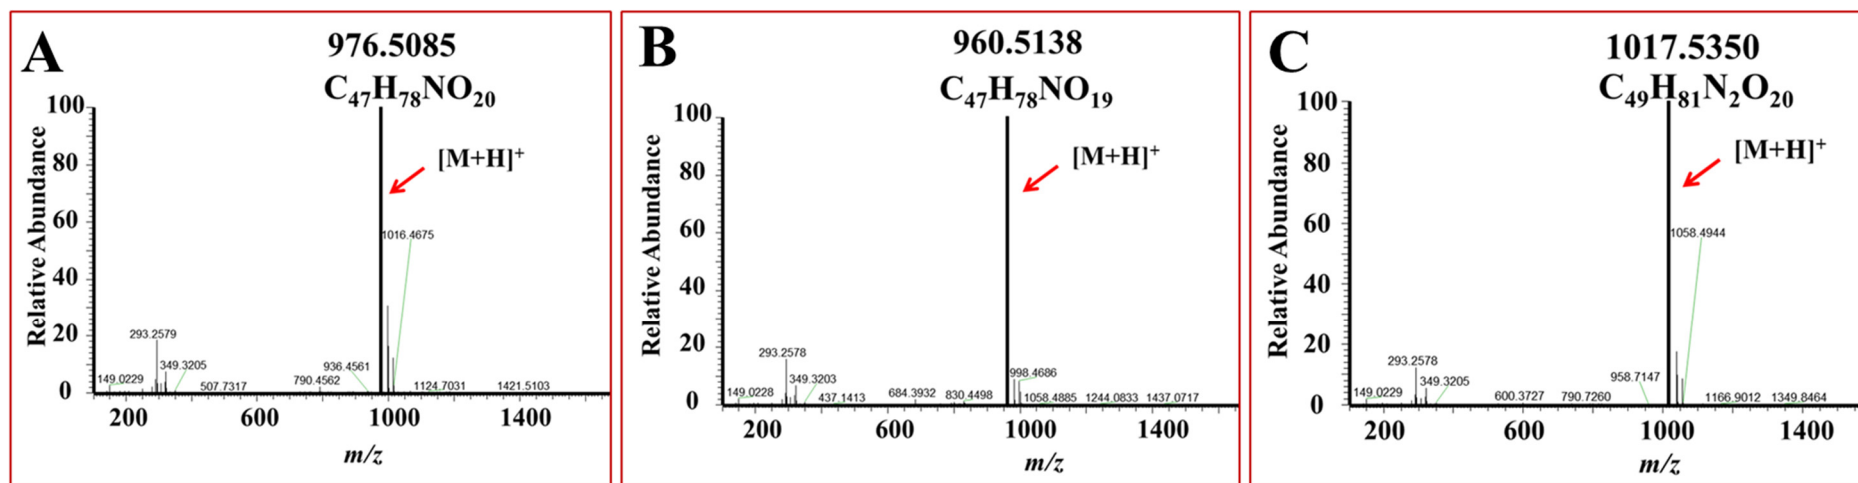

Figure S14 The mass spectrum of midcamycin monoglycosides **1e** (A), **1f** (B) and **1g** (C) giving a molecular ion peak at  $m/z$  976.5085, 960.5138 and 1017.5350, respectively.

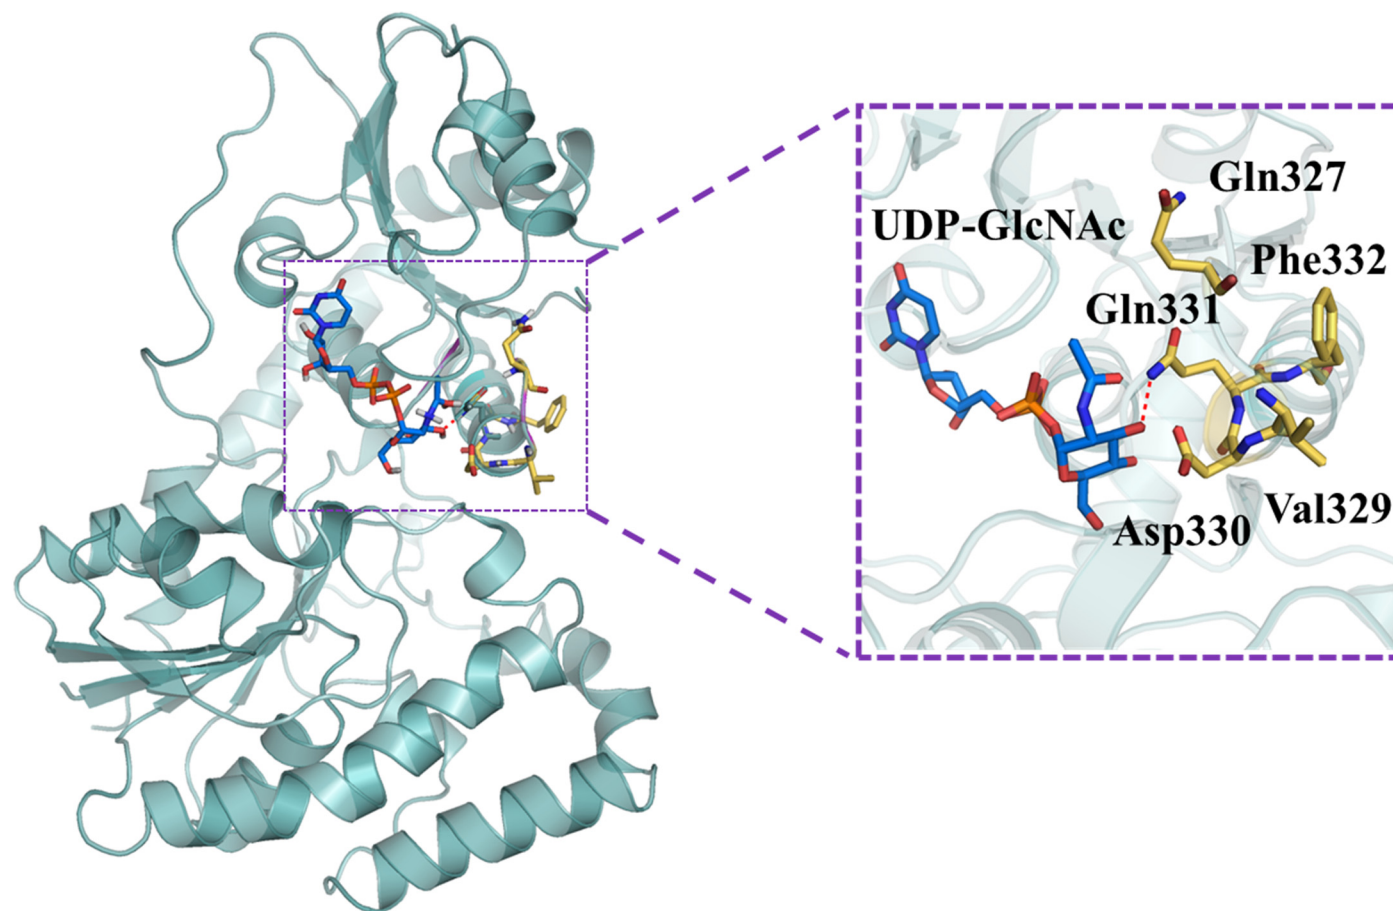

Figure S15 The modelled complex structure of OleD with UDP-GlcNAc. Gln331 and its surrounding residues were positioned in the purple inset

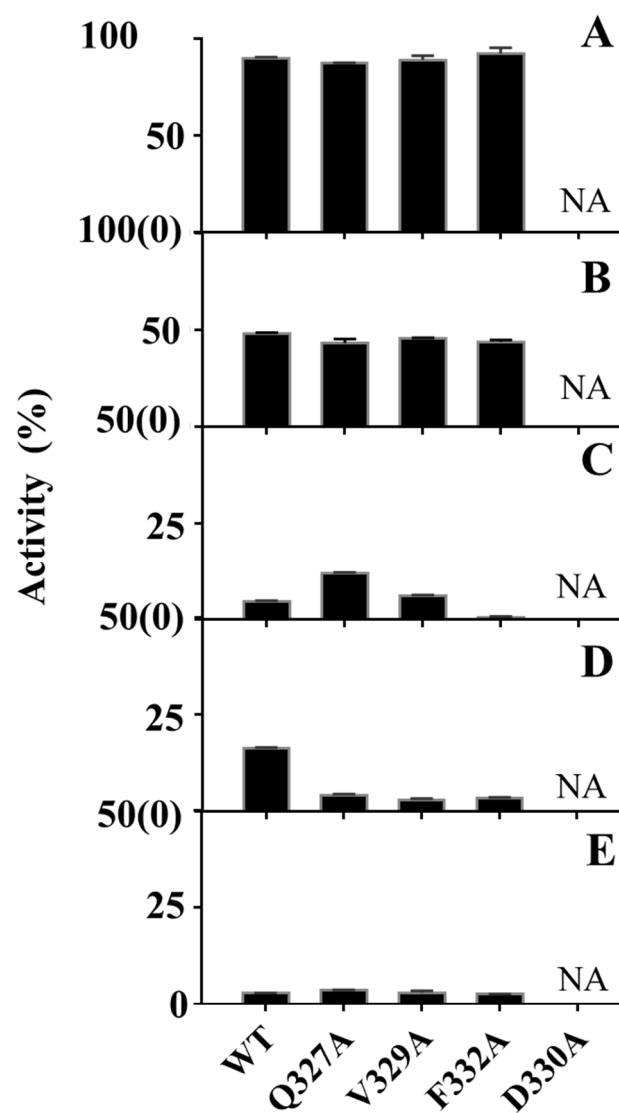

Figure S16 The effect of alanine-scanning mutagenesis of four residues on the conversions towards UDP-Glc (A), UDP-Xyl (B), UDP-GlcNAc (C), UDP-Rha (D) and UDP-Gal (E).

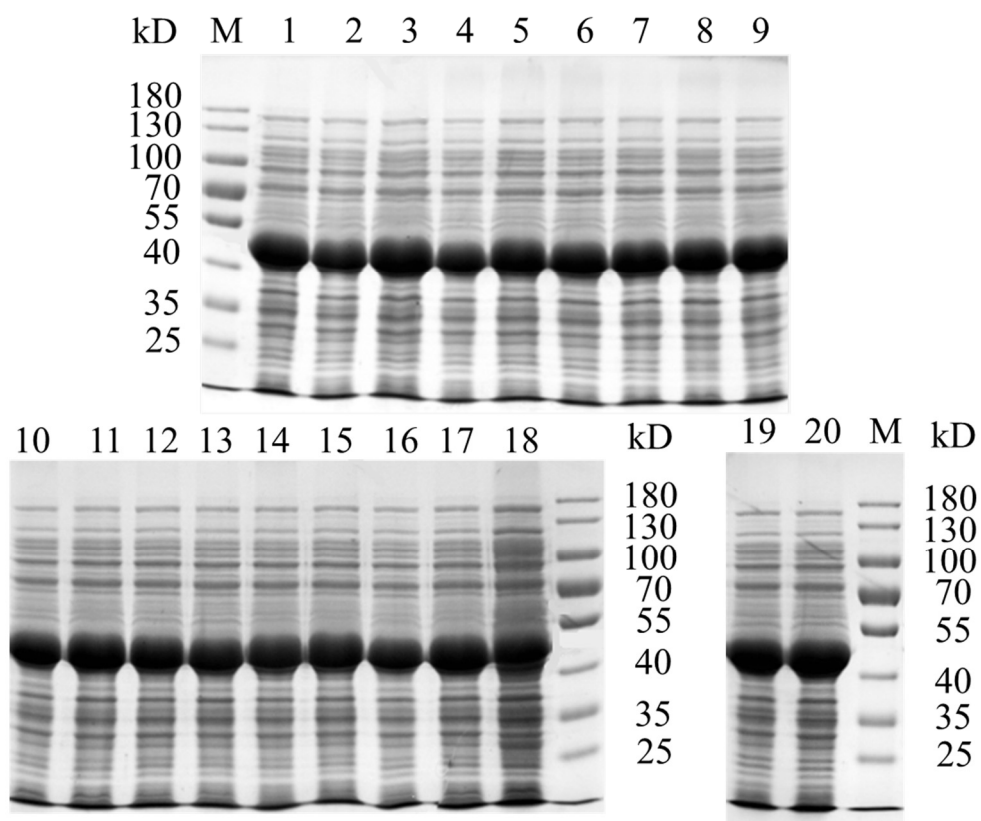

Figure S17 SDS-PAGE analyses of OleD and its 19 Q327 variants  
 Lane M, Protein marker, indicated as kDa in the margin of SDS-PAGE gel; Lane 1-20: OleD, Q327A, Q327C, Q327D, Q327E, Q327F, Q327G, Q327H, Q327I, Q327K, Q327L, Q327M, Q327N, Q327P, Q327R, Q327S, Q327T, Q327V, Q327W, Q327Y.

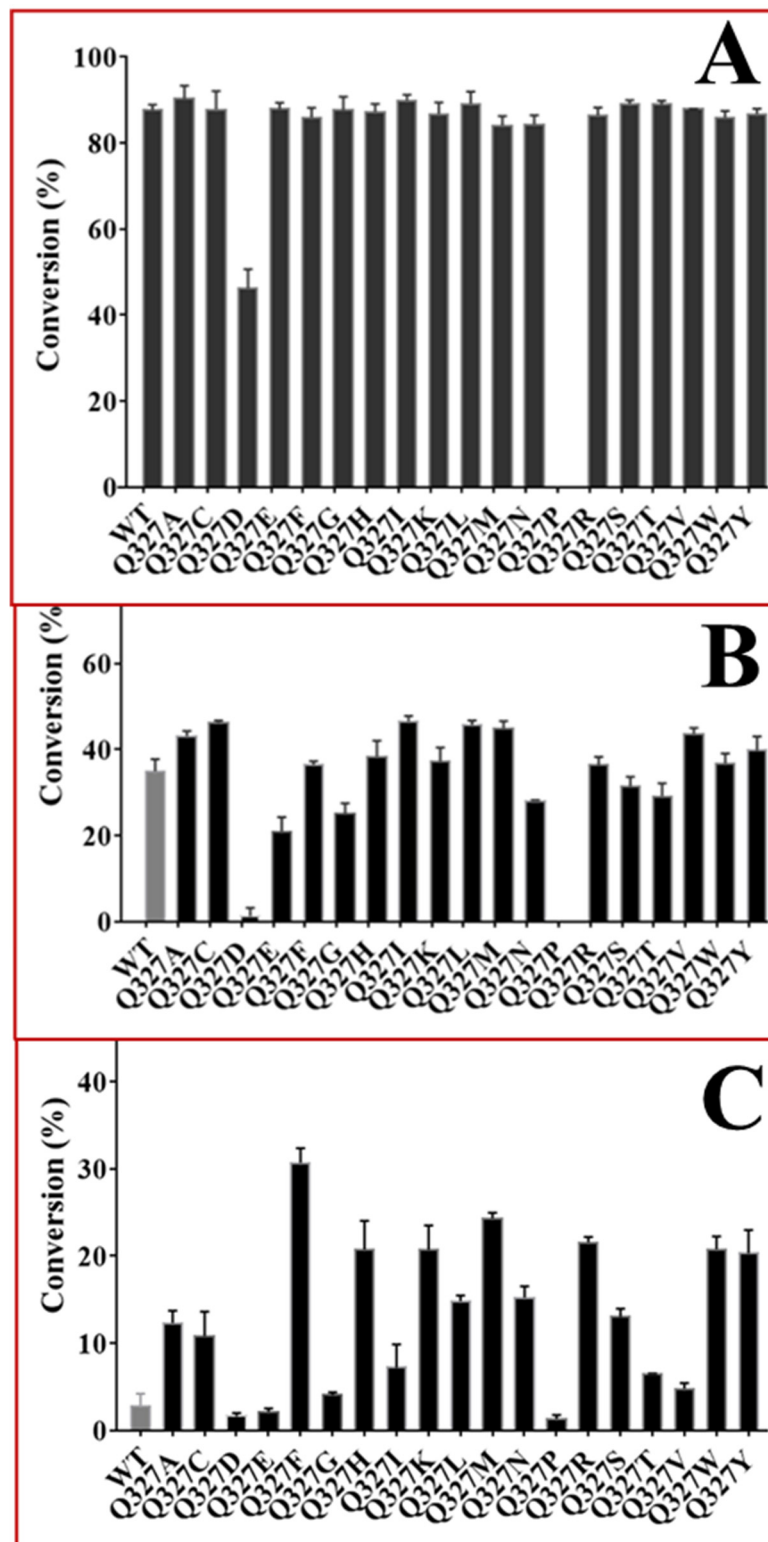

Figure S18 The effect of 19 Q327 variants on the conversions towards UDP-Glc(A), UDP-Xyl (B) and UDP-GlcNAc(C).

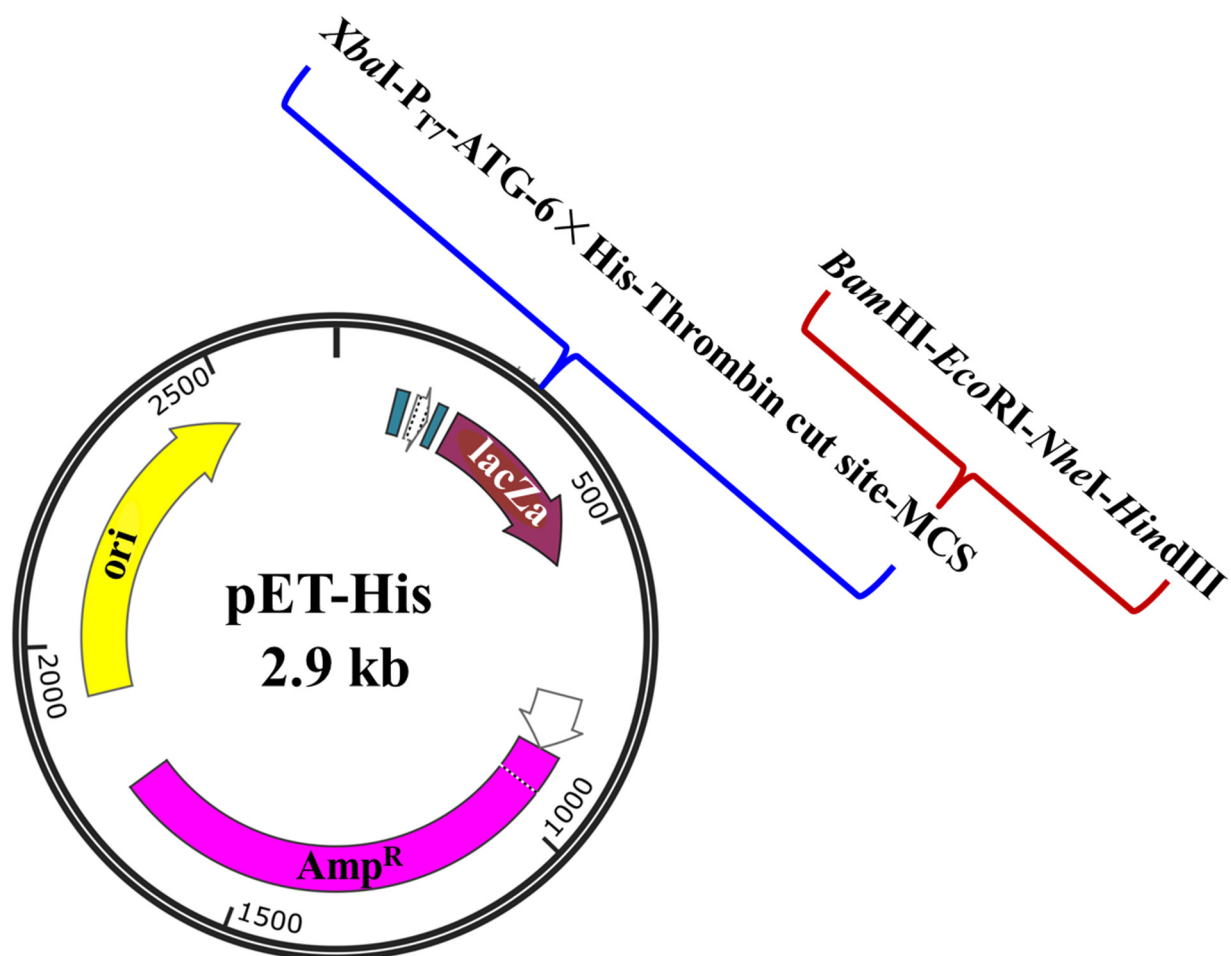

Figure S19 The plasmid map of pET-His

## **Table captions**

Table S1 Plasmids and strains used in this study

Table S2 Primers used in this study

Table S1 Plasmids and strains used in this study

| Strains/plasmids | Description                                                                                                                                                                                        | Source/Reference            |
|------------------|----------------------------------------------------------------------------------------------------------------------------------------------------------------------------------------------------|-----------------------------|
| Strain           |                                                                                                                                                                                                    |                             |
| <i>Trans1-T1</i> | F <sup>-</sup> $\phi 80$ ( <i>lacZ</i> ) $\Delta$ M15 $\Delta$ <i>lacX74</i> <i>hsdR</i> ( <i>r<sub>K</sub><sup>-</sup></i> , <i>m<sub>K</sub><sup>+</sup></i> ) $\Delta$ <i>recA1398endA1tonA</i> | TransGen,<br>Beijing, China |
| BL21(DE3)        | F <sup>-</sup> <i>ompT</i> <i>hsdS</i> ( <i>rB-mB</i> -) <i>gal</i> <i>dcm</i> (DE3)                                                                                                               | TransGen,<br>Beijing, China |
| Plasmid          |                                                                                                                                                                                                    |                             |
| pET-His          | pUC18 derived vector in which an expression cassette containing T7 promoter and MCS was inserted into <i>Xba</i> I and <i>Hind</i> III sites                                                       | This study                  |
| pETHis-OleD      | pET-His derived vector containing <i>oleD</i> gene                                                                                                                                                 | This study                  |
| pColdTF          | A fusion cold shock expression vector that expresses trigger factor (TF) chaperone as a soluble fusion tag                                                                                         | Takara                      |
| pColdTF-desVII   | pColdTF derived vector containing <i>desVII</i> gene                                                                                                                                               | This study                  |
| pColdTF-spnP     | pColdTF derived vector containing <i>spnP</i> gene                                                                                                                                                 | This study                  |
| pColdTF-srm29    | pColdTF derived vector containing <i>srm29</i> gene                                                                                                                                                | This study                  |



Table S2 Primers used in this study

| Primer           | Sequence (5'-3')                           | Description                       |
|------------------|--------------------------------------------|-----------------------------------|
| <i>oleD</i> -F   | CGCGGATCCACCACCCAGACCACTCCCG               | Forward primer for pETHis-OleD    |
| <i>oleD</i> -R   | CCGGAATTCTCACCCACCGTTGGGTCGGT              | Reverse primer for pETHis-OleD    |
| <i>srm29</i> -F  | CATATGGAGCTCGGTACCCTCGAGGTCTCTGACTTCC      | Forward primer for pColdTF-Srm29  |
| <i>srm29</i> -R  | AGACTGCAGGTCGACAAGCTTTCAGGCACGGCGGTG       | Reverse primer for pColdTF-Srm29  |
| <i>spnP</i> -F   | CATATGGAGCTCGGTACCCTCGAGATGGTGATTCTTGGCATG | Forward primer for pColdTF-Snp    |
| <i>spnP</i> -R   | TCTAGACTGCAGGTCGACAAGCTTTCACGGATGGCCATC    | Reverse primer for pColdTF-Snp    |
| <i>desVII</i> -F | CATATGGAGCTCGGTACCCTCGAGATGCGCGTCTGTGACC   | Forward primer for pColdTF-DesvII |
| <i>desVII</i> -R | TCTAGACTGCAGGTCGACAAGCTTTCAGTGCCGGGCGTC    | Reverse primer for pColdTF-DesvII |
| OleD-D330A-F     | CCGTACCGCAGGCCGTGCGCGAGTTCGGCAAC           | Forward primer for OleD-D330A     |
| OleD-D330A-R     | CGCGACGGCCTGCGGTACGGCGATCATGGGCG           | Reverse primer for OleD-D330A     |
| OleD-F332A-F     | CCGCAGGCCGTGACACAGGCGGGCAACGCCGAC          | Forward primer for OleD-F332A     |
| OleD-F332A-R     | CGCCTGGTCGACGGCCTGCGGTACGGCGATCAT          | Reverse primer for OleD-F332A     |
| OleD-V329A-F     | ATCGCCGTACCGCAGGCCGCGGACCAGTTCGG           | Forward primer for OleD-V329A     |
| OleD-V329A-R     | CGCGGCCTGCGGTACGGCGATCATGGGCGTCG           | Reverse primer for OleD-V329A     |
| OleD-Q327A-F     | CCCATGATCGCCGTACCGGCGGCCGTGACACAGT         | Forward primer for OleD-Q327A     |
| OleD-Q327A-R     | GCCGGTACGGCGATCATGGGCGTCGCGGTGGC           | Reverse primer for OleD-Q327A     |
| OleD-Q327H-F     | CCCATGATCGCCGTACCGCATGCCGTGACACAGT         | Forward primer for OleD-Q327H     |
| OleD-Q327H-R     | ATGCGGTACGGCGATCATGGGCGTCGCGGTG            | Reverse primer for OleD-Q327H     |
| OleD-Q327R-F     | CCCATGATCGCCGTACCGCGCGCCGTGACACAGT         | Forward primer for OleD-Q327R     |
| OleD-Q327R-R     | GCGCGGTACGGCGATCATGGGCGTCGCGGTG            | Reverse primer for OleD-Q327R     |
| OleD-Q327K-F     | CCCATGATCGCCGTACCGAAAGCCGTGACACAGT         | Forward primer for OleD-Q327K     |
| OleD-Q327K-R     | TTTCGGTACGGCGATCATGGGCGTCGCGGTGG           | Reverse primer for OleD-Q327K     |
| OleD-Q327E-F     | CCCATGATCGCCGTACCGGAAGCCGTGACACAGT         | Forward primer for OleD-Q327E     |
| OleD-Q327E-R     | TTCCGGTACGGCGATCATGGGCGTCGCGGTGGC          | Reverse primer for OleD-Q327E     |
| OleD-Q327D-F     | CCCATGATCGCCGTACCGGATGCCGTGACACAGT         | Forward primer for OleD-Q327D     |
| OleD-Q327D-R     | ATCCGGTACGGCGATCATGGGCGTCGCGGTGGC          | Reverse primer for OleD-Q327D     |
| OleD-Q327N-F     | CCCATGATCGCCGTACCGAACGCCGTGACACAGT         | Forward primer for OleD-Q327N     |
| OleD-Q327N-R     | GTTCGGTACGGCGATCATGGGCGTCGCGGTGGC          | Reverse primer for OleD-Q327N     |
| OleD-Q327M-F     | CCCATGATCGCCGTACCGATGGCCGTGACACAGT         | Forward primer for OleD-Q327M     |
| OleD-Q327M-R     | ATCGGTACGGCGATCATGGGCGTCGCGGTGGC           | Reverse primer for OleD-Q327M     |
| OleD-Q327C-F     | CCCATGATCGCCGTACCGTGCGCCGTGACACAGT         | Forward primer for OleD-Q327C     |
| OleD-Q327C-R     | GCACGGTACGGCGATCATGGGCGTCGCGGTGGC          | Reverse primer for OleD-Q327C     |
| OleD-Q327T-F     | CCCATGATCGCCGTACCGACCGCCGTGACACAGT         | Forward primer for OleD-Q327T     |
| OleD-Q327T-R     | GGTCGGTACGGCGATCATGGGCGTCGCGGTGG           | Reverse primer for OleD-Q327T     |
| OleD-Q327S-F     | CCCATGATCGCCGTACCGAGCGCCGTGACACAGT         | Forward primer for OleD-Q327S     |
| OleD-Q327S-R     | GCTCGGTACGGCGATCATGGGCGTCGCGGTGG           | Reverse primer for OleD-Q327S     |
| OleD-Q327W-F     | CCCATGATCGCCGTACCGTGGGCCGTGACACAGT         | Forward primer for OleD-Q327W     |
| OleD-Q327W-R     | CACGGTACGGCGATCATGGGCGTCGCGGTGG            | Reverse primer for OleD-Q327W     |
| OleD-Q327Y-F     | CCCATGATCGCCGTACCGTATGCCGTGACACAGT         | Forward primer for OleD-Q327Y     |
| OleD-Q327Y-R     | ATACGGTACGGCGATCATGGGCGTCGCGGTGGC          | Reverse primer for OleD-Q327Y     |
| OleD-Q327F-F     | CCCATGATCGCCGTACCGTTTGCCGTGACACAGT         | Forward primer for OleD-Q327F     |
| OleD-Q327F-R     | AAACGGTACGGCGATCATGGGCGTCGCGGTGGC          | Reverse primer for OleD-Q327F     |
| OleD-Q327P-F     | CCCATGATCGCCGTACCGCCGGCCGTGACACAGT         | Forward primer for OleD-Q327P     |
| OleD-Q327P-R     | GGCGGTACGGCGATCATGGGCGTCGCGGTGG            | Reverse primer for OleD-Q327P     |
| OleD-Q327I-F     | CCCATGATCGCCGTACCGATTGCCGTGACACAGT         | Forward primer for OleD-Q327I     |
| OleD-Q327I-R     | AATCGGTACGGCGATCATGGGCGTCGCGGTGG           | Reverse primer for OleD-Q327I     |
| OleD-Q327L-F     | CCCATGATCGCCGTACCGCTGGCCGTGACACAGT         | Forward primer for OleD-Q327L     |
| OleD-Q327L-R     | AGCGGTACGGCGATCATGGGCGTCGCGGTGG            | Reverse primer for OleD-Q327L     |
| OleD-Q327V-F     | CCCATGATCGCCGTACCGGTGGCCGTGACACAGT         | Forward primer for OleD-Q327V     |
| OleD-Q327V-R     | ACCGGTACGGCGATCATGGGCGTCGCGGTGGC           | Reverse primer for OleD-Q327V     |
| OleD-Q327G-F     | CCCATGATCGCCGTACCGGGCGCCGTGACACAGT         | Forward primer for OleD-Q327G     |
| OleD-Q327G-R     | GCCCGGTACGGCGATCATGGGCGTCGCGGTGGC          | Reverse primer for OleD-Q327G     |
